# Supplementary material
Source: publisher site journal article supplement (https://www.degruyter.com/publication/journal_key/ZFW/downloadAsset/ZFW_Harvard_Reference%20style_quickguide.pdf)
Supplement: Supplementary file 1 [file ZFW_Harvard_Reference%20style_quickguide.pdf]

# REFERENCE STYLE HARVARD

## In-text citation

|                     |                                                                                   |
|---------------------|-----------------------------------------------------------------------------------|
| Direct              | Parentheses ( ), e.g. “... tool developed by Hooijmans et al. (2014).”            |
| Indirect            | Parentheses ( ), e.g. “... proteins were investigated (Abbas and Dutta 2009) ...” |
| More than 2 authors | First author is listed, followed by et al.                                        |

## Journal and articles

|                           |                                                                                                                                                                                                                                                                                                                  |
|---------------------------|------------------------------------------------------------------------------------------------------------------------------------------------------------------------------------------------------------------------------------------------------------------------------------------------------------------|
| Journal article           | Trolleite, F., Huynen, M.-C., Vermeulen, C., and Hambuckers, A. (2014). Use of camera traps for wildlife studies. A review. <i>Biotechnol Agron. Soc. Env.</i> 18: 446–454.                                                                                                                                      |
| More than 10 authors      | First 10 authors are listed, followed by et al.                                                                                                                                                                                                                                                                  |
| Journal article with DOI  | Nyumba, T.O., Wilson, K., Derrick, C.J., and Mukherjee, N. (2018). The use of focus group discussion methodology: insights from two decades of application in conservation. <i>Methods Ecol. Evol.</i> 9: 20–32, <a href="https://doi.org/10.1111/2041-210x.12860">https://doi.org/10.1111/2041-210x.12860</a> . |
| Journal article in suppl. | Yuan, M. and Liu, H. (2011). The economic consequences of fair value accounting. <i>Account. Econ. Law.</i> 1 (Suppl. 2): 1–42.                                                                                                                                                                                  |

## Books and chapters

|                       |                                                                                                                                                                                                                                                                                                                                                                                                                     |
|-----------------------|---------------------------------------------------------------------------------------------------------------------------------------------------------------------------------------------------------------------------------------------------------------------------------------------------------------------------------------------------------------------------------------------------------------------|
| Book (authored)       | Andreasen, N.C. (2001). <i>Brave new brain: conquering mental illness in the era of the genome</i> . Oxford University Press, Oxford.                                                                                                                                                                                                                                                                               |
| Book (edited) chapter | Ferres, K. (2001). Idiot box: television, urban myths and ethical scenarios. In: Craven, I. (Ed.). <i>Australian cinema in the 1990s</i> . Frank Cass, London, pp. 175–188.                                                                                                                                                                                                                                         |
| Book online           | Koné, I. (2013). Wildlife in jeopardy inside and outside protected areas in Côte d'Ivoire: the combined effects of disorganization, lack of awareness, and institutional weakness. In: Raven, P.H., Sodhi, N.S., and Gibson, L. (Eds.), <i>Conservation biology</i> . John Wiley & Sons, Oxford, UK, pp. 26–32. <a href="https://doi.org/10.1002/9781118679838.ch4">https://doi.org/10.1002/9781118679838.ch4</a> . |

## Databases and websites

|          |                                                                                                                                                                                                                                                                                                                                                          |
|----------|----------------------------------------------------------------------------------------------------------------------------------------------------------------------------------------------------------------------------------------------------------------------------------------------------------------------------------------------------------|
| Database | Milberger, S. (2002). <i>Evaluation of violence against women with physical disabilities in Michigan, 2000–2001</i> . ICPSR version. Detroit: Wayne State University. Distributed by Ann Arbor, MI: Inter-University Consortium for Political and Social Research. <a href="https://doi.org/10.3886/ICPSR03414">https://doi.org/10.3886/ICPSR03414</a> . |
| Website  | Gracioli, G. (2020). <i>Catálogo taxonômico da Fauna do Brasil</i> , Available at: <a href="http://fauna.jbrj.gov.br/fauna/faunadobrasil/2624">http://fauna.jbrj.gov.br/fauna/faunadobrasil/2624</a> (Accessed 26 May 2022).                                                                                                                             |

Reference list entries in alphabetical order
